# Supplementary material for: Characteristics and Distribution of Intracranial Aneurysms in Patients with Autosomal Dominant Polycystic Kidney Disease Compared with the General Population: A Meta-Analysis
Source: PubMed Central journal article supplement (PMC10278849; doi:10.34067/kid.0000000000000092), 2023-02-20
Supplement: kidney360-4-e466-s001.pdf [file kidney360-4-e466-s001.pdf]

**Supplementary Table 1: International Stroke Genetic Consortium – Aneurysm Group**

| <b><u>The @neurIST project</u></b>                             |                                                                                                                                                                                                                                                                                                                                                                                                                                                                                                                                                                                                                                                                                                                                                          |
|----------------------------------------------------------------|----------------------------------------------------------------------------------------------------------------------------------------------------------------------------------------------------------------------------------------------------------------------------------------------------------------------------------------------------------------------------------------------------------------------------------------------------------------------------------------------------------------------------------------------------------------------------------------------------------------------------------------------------------------------------------------------------------------------------------------------------------|
| <b><u>Investigators</u></b>                                    | Alejandro Frangi (Universitat Pompeu Fabra, Barcelona, Spain); Philippe Bijlenga (Geneva University Hospitals and University of Geneva, Geneva, Switzerland); Martin Hofmann-Apitius (Fraunhofer Institut Algorithmen und Wissenschaftliches Rechnen, Sankt Augustin, Germany); Rod Hose (Royal Hallamshire Hospital and University of Sheffield, United Kingdom); Guy Lonsdale (NEC Laboratories Europe, IT Research Division, Sankt Augustin, Germany); Antonio Arbona (NEC Laboratories Europe, IT Research Division, Sankt Augustin, Germany); Peer Hasselmeyer (NEC Laboratories Europe, IT Research Division, Sankt Augustin, Germany); Daniel Rüfenacht (Hôpitaux Universitaire de Genève et Faculté de médecine de Genève, Geneva, Switzerland). |
| <b><u>Ethical and legal review committee</u></b>               | Jessica Wright (Durham University Department of Law, United Kingdom); Jeremy Wilkins (Durham University Department of Law, United Kingdom); Derick Beyleveld (Durham University Department of Law, United Kingdom); Bernice Elger (Hôpitaux Universitaire de Genève et Faculté de médecine de Genève, Geneva, Switzerland).                                                                                                                                                                                                                                                                                                                                                                                                                              |
| <b><u>Information platform development and maintenance</u></b> | Alan Waterworth (Royal Hallamshire Hospital and University of Sheffield, United Kingdom); Steven Wood (Royal Hallamshire Hospital and University of Sheffield, United Kingdom); Jimison Iavindrasana (Hôpitaux Universitaire de Genève et Faculté de médecine de Genève, Geneva, Switzerland); Rodolphe Meyer (Hôpitaux Universitaire de Genève et Faculté de médecine de Genève, Geneva, Switzerland); Christoph M Friedrich (Department of Computer Science, University of Applied Science and Arts, and Department of Computer Science, University of Applied Science and Arts, Dortmund, Germany); Christian Ebeling (Fraunhofer Institut Algorithmen und Wissenschaftliches Rechnen, Sankt Augustin, Germany).                                      |
| <b><u>Epidemiology and statistics</u></b>                      | Christian Ebeling (Fraunhofer Institut Algorithmen und Wissenschaftliches Rechnen, Sankt Augustin, Germany); Philippe Bijlenga (Geneva University Hospitals and University of Geneva, Geneva, Switzerland); Roelof Risselada (Erasmus University Medical Center, Rotterdam, The Netherlands); Christoph m Friedrich (Department of Computer Science, University of Applied Science and Arts, and Department of Computer Science, University of Applied Science and Arts, Dortmund, Germany); Miriam CJM Sturkenboom (Erasmus University Medical Center, Rotterdam, The Netherlands).                                                                                                                                                                     |
| <b><u>Genotyping</u></b>                                       | Carole Proust, François Cambien (Unité Mixte de Recherche (UMR S937) and Pitié-Salpêtrière Post-Genomic Platform (P3S), Institut National de la Santé et de la Recherche Médicale (INSERM), University Pierre and Marie Curie (UPMC), Paris, France).                                                                                                                                                                                                                                                                                                                                                                                                                                                                                                    |

|                                                                                 |                                                                                                                                                                                                                                                                                                                                                                                                                                                                                                                                                                                                                                                                                                                                                                                                                                                                                                                                                                                                                                                                                                                                                                                                                                                                                                                                                                                                                                                                                                                                                                                                                                                                                                                                                                                                                                                                              |
|---------------------------------------------------------------------------------|------------------------------------------------------------------------------------------------------------------------------------------------------------------------------------------------------------------------------------------------------------------------------------------------------------------------------------------------------------------------------------------------------------------------------------------------------------------------------------------------------------------------------------------------------------------------------------------------------------------------------------------------------------------------------------------------------------------------------------------------------------------------------------------------------------------------------------------------------------------------------------------------------------------------------------------------------------------------------------------------------------------------------------------------------------------------------------------------------------------------------------------------------------------------------------------------------------------------------------------------------------------------------------------------------------------------------------------------------------------------------------------------------------------------------------------------------------------------------------------------------------------------------------------------------------------------------------------------------------------------------------------------------------------------------------------------------------------------------------------------------------------------------------------------------------------------------------------------------------------------------|
| <p><u>Participating Centers (In Order of Number of Recruited Patients):</u></p> | <p>Geneva University Hospitals and University of Geneva, Geneva, Switzerland (Philippe Bijlenga, Max Jägersberg, Alister Rogers, Bawarjan Schatlo, Patrick Teta, Nathalie Isidor, Karl Schaller, Vitor Mendes- Pereira, Ana Marcos Gonzalez, Ana Paula Narata, Zsolt Kulcsár, Karl O Lovblad, Paolo Machi, Daniel A. Rüfenacht); John Radcliffe Hospital, University of Oxford, Oxford, United Kingdom (Julia Yarnold, Paul Summers, Alison Clarke, Gulam Zilani, James Byrne); Hospital Clinic, Barcelona, Spain (Juan Macho, Jordi Blasco); University of Pècs Medical School, Pècs, Hungary (Peter Bukovics, Ferenc Kover, Istvan Hudak, Tamas Doczi); Erasmus University Medical Center, Rotterdam, The Netherlands (Roelof Risselada, Miriam CJM Sturkenboom); Royal Hallamshire Hospital, Sheffield, United Kingdom (Pankaj Singh, Alan Waterworth, Umang Patel, Stuart Coley, Patricia Lawford); Hospital General de Catalunya, San Cugat del Valles, Spain (Teresa Sola, Elio Vivas).</p>                                                                                                                                                                                                                                                                                                                                                                                                                                                                                                                                                                                                                                                                                                                                                                                                                                                                            |
| <p><b><u>The ICAN Study Group</u></b></p>                                       |                                                                                                                                                                                                                                                                                                                                                                                                                                                                                                                                                                                                                                                                                                                                                                                                                                                                                                                                                                                                                                                                                                                                                                                                                                                                                                                                                                                                                                                                                                                                                                                                                                                                                                                                                                                                                                                                              |
| <p><u>Investigators</u></p>                                                     | <p>Hubert Desal, Romain Bourcier, Bertrand Isidor, Jérôme Connault, Pierre Lebranchu, Thierry Le Tourneau - University Hospital of Nantes, Nantes, France. Chrisanthi Papagiannaki - University Hospital of Rouen, Rouen, France. Michel Piotin, Hocine Redjem, Mikael Mazighi, Jean Philippe Desilles - Fondation Rothschild Hospital, Paris, France. Olivier Naggara, Denis Trystram, Myriam Edjlali-Goujon, Grégoire Boulouis, Christine Rodriguez, Waghi Ben Hassen- Saint Anne Hospital, Paris, France. Suzanna Saleme, Charbel Mounayer, Aymeric Rouchaud- University Hospital of Limoges, Limoges, France. Olivier Levrier, Pierre Aguetzaz, Xavier Combaz – Clairval Hospital, Marseille, France. Anne Pasco, Vincent l’Allinec - University Hospital of Angers, Angers, France. Marc Bintner, Marc Molho, Pascale Gauthier - University Hospital of La Réunion, Saint-Denis de La Réunion, France. Cyril Chivot - University Hospital of Amiens, Amiens, France. Vincent Costalat, Cyril Darganzil, Alain Bonafé - University Hospital of Montpellier, Montpellier, France. Anne Christine Januel, Caterina Michelozzi, Christophe Cognard, Fabrice Bonneville, Philippe Tall, Jean Darcourt - University Hospital of Toulouse, Toulouse, France. Alessandra Biondi, Cristina Iosif- University Hospital of Besançon, Besançon, France. Jean Christophe Ferre, Jean Yves Gauvrit, François Eugene, Hélène Raoult - University Hospital of Rennes, Rennes, France. Jean Christophe Gentric, Julien Ognard- University Hospital of Brest, Brest, France René Anxionnat, Benjamin Gory, Serge Bracard, Anne Laure Derelle, Romain Tonnelet University Hospital of Nancy, Nancy, France. Laurent Spelle, Léon Ikka, Augustin Ozanne, Sophie Gallas, Jildaz Caroff, Nidal Ben Achour, Jacques Moret – Le Kremlin Bicêtre Hospital, Paris, France. Emmanuel Chabert -</p> |

|                                                                                              |                                                                                                                                                                                                                                                                                                                                                                                                                                                                                                                                                                                                                                                                                                                                                                                                                                                                                                                                                                                                                                                                                                                                                                                                                                                                                                                                                                                                    |
|----------------------------------------------------------------------------------------------|----------------------------------------------------------------------------------------------------------------------------------------------------------------------------------------------------------------------------------------------------------------------------------------------------------------------------------------------------------------------------------------------------------------------------------------------------------------------------------------------------------------------------------------------------------------------------------------------------------------------------------------------------------------------------------------------------------------------------------------------------------------------------------------------------------------------------------------------------------------------------------------------------------------------------------------------------------------------------------------------------------------------------------------------------------------------------------------------------------------------------------------------------------------------------------------------------------------------------------------------------------------------------------------------------------------------------------------------------------------------------------------------------|
|                                                                                              | <p>University Hospital of Clermont-Ferrand, Clermont-Ferrand, France. Jérôme Berge, Gaultier Marnat, Xavier Barreau, Florent Gariel - University Hospital of Bordeaux, Bordeaux, France. Frédéric Clarencon, Eimad Shotar – La Pitié Salpêtrière Hospital, Paris, France. Mohammed Aggour - University Hospital of Saint Etienne, Saint Etienne, France. Frédéric Ricolfi, Adrien Chavent, Pierre Thouant - University Hospital of Dijon, Dijon, France. Pablo Lebidinsky, Brivael Lemogne - Colmar Hospital, Colmar, France. Denis Herbreteau, Richard Bibi, Kevin Janot - University Hospital of Tours, Tours, France. Laurent Pierot, Sébastien Soize - University Hospital of Reims, Reims, France. Marc Antoine Labeyrie, Christophe Vandendries, Emmanuel Houdart - Lariboisière Hospital, Paris, France. Appoline Kazemi, Xavier Leclerc, Jean Pierre Pruvo, Nicolas Bricout - University Hospital of Lille, Lille, France. Stéphane Velasco, Samy Boucebcı- University Hospital of Poitiers, Poitiers, France.</p>                                                                                                                                                                                                                                                                                                                                                                         |
| <u>Epidemiology and statistics</u>                                                           | Christian Dina, Floriane Simonet, Eric Charpentier.                                                                                                                                                                                                                                                                                                                                                                                                                                                                                                                                                                                                                                                                                                                                                                                                                                                                                                                                                                                                                                                                                                                                                                                                                                                                                                                                                |
| <u>Genotyping</u>                                                                            | Richard Redon, Gervaise Loirand, Jean-Jacques Schott, Stéphanie Chatel, Emmanuelle Bourcereau, Estelle Baron, Stéphanie Bonnaud.                                                                                                                                                                                                                                                                                                                                                                                                                                                                                                                                                                                                                                                                                                                                                                                                                                                                                                                                                                                                                                                                                                                                                                                                                                                                   |
| <b><u>Genetics and Observational Subarachnoid Haemorrhage (GOSH) Study investigators</u></b> |                                                                                                                                                                                                                                                                                                                                                                                                                                                                                                                                                                                                                                                                                                                                                                                                                                                                                                                                                                                                                                                                                                                                                                                                                                                                                                                                                                                                    |
| <u>Investigators</u>                                                                         | <p>Dr Stephen Bonner. The James Cook University Hospital, Middlesbrough, UK<br/> Mr Daniel Walsh. King’s College Hospital NHS Foundation Trust, London, UK. Mr Diederik Bulters. University Hospital Southampton NHS Foundation Trust, Southampton UK. Mr Neil Kitchen. The National Hospital of Neurology and Neurosurgery, London, UK. Prof Martin Brown. UCL Queen Square Institute of Neurology, London, UK. Ms Joan Grieve. The National Hospital of Neurology and Neurosurgery, London, UK. Mr Gareth Roberts. Royal Preston Hospital, UK. Mr Timothy Jones. St George’s Hospital, London, UK. Mr Giles Critchley. Hurstwood Park Neurological Centre, UK. Prof Pankaj Sharma. Imperial Healthcare, Charing Cross Hospital, London, UK. Mr Richard Nelson. Frenchay Hospital, Bristol, UK. Prof Peter Whitfield. Derriford Hospital, Plymouth, UK. Mr Stuart Ross. Leeds General Infirmary, UK. Mr Hiren Patel. Salford Royal Hospital, UK. Mr Paul Eldridge. The Walton Centre, Liverpool, UK. Dr Kari Saastamoinen. The Royal London Hospital, London, UK. Mr Umang Patel. Sheffield Teaching Hospitals NHS Trust, UK. Dr Enas Lawrance. Mayday Hospital, Croydon, UK. Dr Subha Vandabona. Mount Gould Hospital, Plymouth, UK. Professor David Mendelow. Newcastle University Hospitals NHS Trust. Ms Rachel Teal. Oxford Radcliffe Infirmary, UK. Dr Orlando Warner. Oxford Radcliffe</p> |

Infirmery, UK. Professor Peter Kirkpatrick. Addenbrooke's Hospital, Cambridge, UK

**International Stroke Genetics consortium (ISGC)**

Sudha Seshadri, Department of Neurology, Boston University School of Medicine, Framingham Heart Study, Boston, MA, USA

Laura Kilarski, University of Cologne, Germany

Hyacinth I Hyacinth, Aflac Cancer and Blood Disorder Center, Department of Pediatrics, Emory University School of Medicine, Atlanta, GA, USA

Jamary Oliveira-Filho, Stroke and Cardiomyopathy Clinics, Federal University of Bahia, Brazilian National Research Committee (CNPq), Instituto Nacional de Ciencia e Tecnologia em Doencas Tropicais (INCT-DT), Salvador, Brazil

Sandro Marini, Center for Human Genetic Research, Harvard Medical School, Boston, MA, USA

Sunaina Yadav, Imperial College Cerebrovascular Research Unit, Department of Clinical Neuroscience, Imperial College London, London, UK

Paul Nyquist, Department of Anesthesiology and Critical Care Medicine, Johns Hopkins Medicine, Baltimore, MD, USA

Cathryn Lewis, Department of Medical and Molecular Genetics, King's College London, SGDP Centre, Institute of Psychiatry, Psychology & Neuroscience, King's College London, London, UK

Bjorn Hansen, Department of Clinical Sciences Lund, Neurology, Lund University, Department of Neurology and Rehabilitation Medicine, Skåne University Hospital, Lund, Sweden

Bo Norrving, Sahlgrenska Academy at University of Gothenburg, Lund University, Department of Neurology and Rehabilitation Medicine, Skåne University Hospital, Lund, Sweden

Gustav Smith, Department of Clinical Sciences Lund, Cardiology, Lund University, The Section for Heart Failure and Valvular Disease, VO Heart and Lung medicine, Skane University Hospital, Lund, Sweden

Jonathan Rosand, Department of Neurology, Massachusetts General Hospital, Center for Human Genetic Research, Massachusetts General Hospital (MGH), Boston, MA, USA

Alessandro Biffi, Division of Behavioral Neurology, Department of Neurology, Massachusetts General Hospital, Center for Human Genetic Research, Massachusetts General Hospital (MGH), Boston, MA, USA

Christina Kourkoulis, Department of Neurology, Massachusetts General Hospital, Center for Human Genetic Research, Massachusetts General Hospital (MGH), Boston, MA, USA

Chris Anderson, Center for Genomic Medicine, Massachusetts General Hospital (MGH), J. Philip Kistler Stroke Research Center, Department of Neurology, Massachusetts General Hospital (MGH), Boston, MA, USA

Anne-Katrin Giese, Department of Neurology, Massachusetts General Hospital, Harvard Medical School, Department of Neurology, J. Philip Kistler Stroke Research Center, MGH, Boston, MA, USA

Ralph Sacco, Department of Neurology, Miller School of Medicine, University of Miami, Miami, FL, USA

Pankaj Sharma, Institute of Cardiovascular Research, Royal Holloway University of London, London, UK

Oh Young Bang, Department of Neurology, Samsung Medical Center, Sungkyunkwan University School of Medicine, Seoul, Korea

Jong-Won Chung, Department of Neurology, Samsung Medical Center, Sungkyunkwan University School of Medicine, Seoul, USA

Gyeong-Moon Kim, Department of Neurology, Samsung Medical Center, Sungkyunkwan University School of Medicine, Seoul, Korea

Qishuai Zhuang, Department of Pharmacology, School of Life Science and Biopharmaceutical Sciences, Shenyang Pharmaceutical University, Shenyang, China

Wayne Sheu, Department of Internal Medicine, Taichung Veterans General Hospital, Taichung, Taiwan

Steven Lubitz, Department of Cardiology, Massachusetts General Hospital, Harvard Medical School, Boston, MA, USA

David Werring, Stroke Research Centre, Department of Brain Repair and Rehabilitation, University College London Queen Square Institute of Neurology, London, UK

John Hardy, Reta Lila Weston Institute, UCL Institute of Neurology, University College London, London, UK

June Smalley, Reta Lila Weston Institute, UCL Institute of Neurology, University College London, London, UK

Romain Bourcier, Department of Neuroradiology, University Hospital of Nantes, Nantes, France

Pacôme Constant-dits-Beaufils, CHU de Nantes, INSERM CIC 1413 , Pôle Hospitalo-Universitaire 11: Santé Publique, Clinique des données, Nantes, France

Matilde Karakachoff, CHU de Nantes, INSERM CIC 1413 , Pôle Hospitalo-Universitaire 11: Santé Publique, Clinique des données, Nantes, France

Antoine Rimbert, INSERM, CNRS, UNIV Nantes, CHU Nantes, L'institut Du Thorax, Nantes, France

Joanna Howson, MRC/BHF Cardiovascular Epidemiology Unit, Department of Public Health and Primary Care, University of Cambridge, Cambridge, UK

Alessandra Granata, Department of Clinical Neurosciences, University of Cambridge, Cambridge, UK

Anna Drazyk, Department of Clinical Neurosciences, University of Cambridge, Cambridge, UK

Hugh Markus, Stroke Research Group, Division of Clinical Neurosciences, University of Cambridge, Cambridge, UK

Joanna Wardlaw, Neuroimaging Sciences, University of Edinburgh, Centre for Clinical Brain Sciences, University of Edinburgh, Edinburgh, UK

Braxton Mitchell, Department of Medicine, University of Maryland School of Medicine, Geriatrics Research and Education Clinical Center, Baltimore Veterans Administration Medical Center, Baltimore, MD, USA

John Cole, Department of Neurology, University of Maryland School of Medicine and Baltimore VAMC, Baltimore, MD, USA

Anbupalam Thalamuthu, Centre for Healthy Brain Ageing, Psychiatry, University of New South Wales (UNSW), Sydney, Australia

Jemma Hopewell, Clinical Trial Service Unit and Epidemiological Studies Unit, Nuffield Department of Population Health, University of Oxford, Oxford, UK

Robin G Walters, Clinical Trial Service Unit and Epidemiological Studies Unit, Nuffield Department of Population Health, and MRC Population Health Research Unit, University of Oxford, Oxford, UK

Iain Turnbull, Clinical Trial Service Unit and Epidemiological Studies Unit, Nuffield Department of Population Health, University of Oxford, Oxford, UK

Bradford B Worrall, Departments of Neurology and Public Health Sciences, University of Virginia School of Medicine, Charlottesville, VA, USA

Josh Bis, Cardiovascular Health Research Unit, Department of Medicine, University of Washington, Seattle, WA, USA

David Tirschwell, Comprehensive Stroke Care at the UW Medicine Stroke Center at Harborview Medical Center, University of Washington, Seattle, WA, USA

Alex Reiner, Department of Epidemiology, University of Washington, Fred Hutchinson Cancer Research Center, University of Washington, Seattle, WA, USA

Raj Dhar, Department of Neurology, Washington University School of Medicine, St. Louis, MO, USA

Laura Heitsch, Department of Neurology, Radiology, and Biomedical Engineering, Washington University School of Medicine, St. Louis, MO, USA

Jin-Moo Lee, Department of Neurology, Radiology, and Biomedical Engineering, Washington University School of Medicine, St. Louis, MO, USA

Janne Mortenson, Department of Neurology, Aarhus University Hospital, Aarhus, Denmark

Sylvia Wassertheil-Smoller, Department of Epidemiology and Population Health, Albert Einstein College of Medicine, New York, NY, USA

Kameshwar Prasad, Department of Neurology and Stroke Unit; and Director of Clinical Epidemiology, All India Institute of Medical Sciences (AIIMS), New Delhi, India

Mark Fisher, Department of Neurology, University of Massachusetts Medical School, Worcester, MA, USA

Christopher Traenka, Neurology Clinic, Basel University Hospital, Basel, Switzerland

Xingwu Wang, Beijing Hypertension League Institute, Beijing, China

Yongjun Wang, Center of Stroke, Beijing Institute for Brain Disorders, Department of Neurology, Beijing Tiantan Hospital, Capital Medical University, Beijing, China

Francois Rouanet, Department of Neurology, Bordeaux University Hospital, Bordeaux, France

Igor Sibon, Department of Neurology, Bordeaux University Hospital, Bordeaux, France

Chloé Sarnowski, Department of Biostatistics, Boston University, Boston, USA

Pauline Maillard, Department of Neurology, University of California at Davis, Sacramento, CA, USA

Aleksandra Pikula, Department of Neurology, University of Toronto, Toronto, Canada

Hugo Javier Aparicio, Department of Neurology, Boston University School of Medicine, Boston, USA

Philip Wolf, Boston University School of Medicine, Boston, USA

Josee Dupuis, Boston University School of Public Health, Boston, USA

Qiong Yang, Boston University School of Public Health, Boston, USA

Gustavo Luvizutto, Rehabilitation department, Botucatu Medical School, Botucatu School of Medicine, University Estadual Paulista Júlio de Mesquita Filho, District of Rubião Junior, Botucatu, Brazil

Daniel Chasman, Division of Preventive Medicine, Brigham and Women's Hospital, Harvard Medical School, Boston, MA, USA

Kathryn Rexrode, Department of Medicine, Brigham and Women's Hospital, Harvard Medical School, Boston, USA

Andrea Harriot, Department of Neurology, Brigham and Women's Hospital, Massachusetts General Hospital, Boston, MA, USA

Chia-Ling Phuah, Center for Human Genetic Research, Massachusetts General Hospital (MGH), Division of Neurocritical Care and Emergency Neurology, Department of Neurology, Boston, MA, USA

Gustavo Santo, Stroke Unit, Centro Hospitalar e Universitário de Coimbra, CHUC, Coimbra, Portugal Ales Tomek, Department of Neurology, 2nd Faculty of Medicine, Charles University in Prague and Motol University Hospital, Prague, Czech Republic Jen Gerard, Department of Cardiology, Children's Hospital of Wisconsin, Milwaukee, USA

Cara Carty, Children's Research Institute, Children's National Medical Center, Center for Translational Science, George Washington University, Washington, USA

Guiyou Liu, Chinese Academy of Sciences (CAS), Beijing, China

Sanjith Aaron, Department of Neurological Sciences, Christian Medical College, Vellore, India Christhunesa S. Christudass, Department of Neurological Sciences, Christian Medical College, Vellore, India

BSB Salomi, Department of Neurological Sciences, Christian Medical College, Vellore, India Dharambir Sanghera, Department of Pediatrics, College of Medicine, University of Oklahoma Health Sciences Center, Department of Pharmaceutical Sciences, College of Pharmacy, University of Oklahoma Health Sciences Center, Oklahoma City, USA

Amelia Boehme, Department of Neurology, Columbia University, New York, USA

Mitchell Elkind, Neurological Institute of New York, Columbia University College, New York, USA Gudmar Thorleifsson, DeCODE genetics/AMGEN inc, Reykjavik, Iceland Solveig Gretarsdottir, DeCODE genetics/AMGEN inc, Reykjavik, Iceland

Leslie Lange, University of Colorado Denver - Anschutz Medical Campus, Denver, CO, USA Natalia Rost, Department of Neurology, Massachusetts General Hospital, Harvard Medical School, Boston, MA, USA, Department of Neurology, J. Philip Kistler Stroke Research Center, MGH, Boston, MA, USA

Michael James, Translational Acute Brain Injury Research Center, Duke University, Durham, USA

Jill Stewart, Department of Neurology, Duke University School of Medicine, Durham, USA Larry Goldstein, Department of Medicine, Duke Stroke Center, Duke University School of Medicine, Durham, NC, USA

Salina Waddy, Cardiovascular and Stroke Genetics Working Group, Emory University, Atlanta, USA Carla Ibrahim-Verbaas, Department of Neurology, Erasmus MC, Rotterdam, Netherlands

Dina Vojinovic, Department of Epidemiology, Erasmus MC, University Medical Center Rotterdam, Clinic for Neurology and Psychiatry for Children and Youth, University of

Belgrade, Faculty of Medicine, Rotterdam, Netherlands

Arfan Ikram, Department of Epidemiology, Erasmus University Medical Center, Rotterdam, Netherlands  
Hieab Adams, Department of Epidemiology, Erasmus University Medical Center, Rotterdam, Netherlands

Fadi Charchar, L.E.W. Carty Cardiovascular Genomics laboratory, Federation University Australia, Ballarat, Australia

Vincent Thijs, Stroke Division, Florey Institute of Neuroscience and Mental Health, Department of Neurology, Austin Health, Heidelberg, Australia

Eugenio Parati, Laboratory of Cellular Neurobiology, Fondazione IRCCS Istituto Neurologico C. Besta, Cerebrovascular Disease Unit, Cerebrovascular Disease Unit, Fondazione IRCCS Istituto Neurologico C. Besta, Milan, Italy

Giorgio Boncoraglio, Department of Cerebrovascular Diseases, Fondazione IRCCS Istituto Neurologico Carlo Besta, Milan, Italy

Charles Kooperberg, Division of Public Health Sciences, Fred Hutchinson Cancer Research Center, Seattle, USA

Sherrine Abboud, Laboratory of Experimental Neurology, Free University of Brussels (ULB), Brussels, Belgium

Ramin Zand, Department of Neuroscience, Geisinger Health System, Danville, USA

Philippe Bijlenga, Department of Clinical Neurosciences, Geneva University Hospital and University of Geneva, Geneva, Switzerland

Sandrine Morel, Department of Clinical Neurosciences, Geneva University Hospital and University of Geneva, Geneva, Switzerland

Nathalie Isidor, Department of Clinical Neurosciences, Geneva University Hospital and University of Geneva, Geneva, Switzerland

Torstein R Meling, Department of Clinical Neurosciences, Geneva University Hospital and University of Geneva, Geneva, Switzerland

Karl Schaller, Department of Clinical Neurosciences, Geneva University Hospital and University of Geneva, Geneva, Switzerland

Jerome Dauvillier, SIB Swiss Institute of Bioinformatics, Lausanne, Switzerland

Olivier Martin, SIB Swiss Institute of Bioinformatics, Lausanne, Switzerland

Georg R Spinner, ZHAW School of Life Sciences and Facility Management, Zurich, Switzerland

Sabine Schilling, ZHAW School of Life Sciences and Facility Management, Zurich, Switzerland

Sven Hirsch, ZHAW School of Life Sciences and Facility Management, Zurich, Switzerland

Magdy Selim, Beth Israel Deaconess Medical Center, Harvard Medical School, Boston, USA

Caspar Grond-Ginsbach, Department of Neurology, Heidelberg University Hospital, Heidelberg, Germany

Olli Happola, Department of Neurology, Helsinki University Central Hospital, Helsinki, Finland

Daniel Strbian, Department of Neurology, Helsinki University Central Hospital, Clinical Neurosciences, Neurology, University of Helsinki, Helsinki, Finland



Liisa Tomppo, Department of Neurology, Helsinki University Central Hospital, Helsinki, Finland

Hanne Sallinen, Department of Neurology, Helsinki University Hospital, Helsinki, Finland

Abhishek Pathak, Department of Neurology, Heritage Hospital, Department of Neurology, Neuro Expert Clinic, Varanasi, India

Dorothea Pfeiffer, Department of Neurology, Heidelberg University Hospital, Heidelberg, Germany

Pablo Bonardo, Department of Neurology, Hospital Británico de Buenos Aires, Ciudad Autónoma de Buenos Aires, Argentina

Joao Jose Freitas de Carvalho, Hospital Geral de Fortaleza/SUS Fortaleza, Ceará, Brazil

Priscila Ribeiro, Hospital Governador Celso Ramos, Florianópolis, Brazil

Nuria Torres, Stroke Pharmacogenomics and Genetics, Hospital Mútua de Terrassa, Fundació Docència i Recerca Mútua Terrassa, Terrassa, Spain

Miguel Barboza, Department of Neurology, Hospital Rafael A. Calderon Guardia, San Jose, Costa Rica

Melanie Laarman, Cardiac Development and Genetics Group, Hubrecht Institute, Utrecht, Netherlands

Roberta Carriero, Inflammation and immunology laboratory, Humanitas Clinical Institute, Pavia, Italy

Elizabeth Holliday, Public Health Stream, Hunter Medical Research Institute, Faculty of Health and Medicine, University of Newcastle, New Lambton, Australia

Androniki Plomaritoglou, Neurology, Hygeia Hospital, Marousi, Greece

Johan Bjorkegren, Department of Genetic and Genomic Sciences, Icahn School of Medicine, New York, USA

Yu-Feng Yvonne Chan, Department of Genetic and Genomic Sciences, Icahn School of Medicine, Mount Sinai, New York, USA

Villi Gudnason, Icelandic Heart Association Research Institute, Faculty of Medicine, University of Iceland, Kopavogur, Iceland

Jordi Jimenez-Conde, Institut Hospital del Mar d'Investigacions Biomèdiques (IMIM) and Hospital del Mar, Barcelona, Spain

Elisa Cuadrado-Godia, Institut Hospital del Mar d'Investigacions Biomèdiques (IMIM) and Hospital del Mar, Barcelona, Spain

Carolina Soriano Tarraga, Institut Hospital del Mar d'Investigacions Biomèdiques (IMIM) and Hospital del Mar, Barcelona, Spain

Jaume Roquer, Neurology Service, IMIM-Hospital del Mar, Institut Hospital del Mar d'investigacions Mèdiques, Barcelona, Spain

Paul Bentley, Faculty of Medicine, Department of Medicine, Imperial College London, London, UK

Dipender Gill, Centre for Pharmacology and Therapeutics, Imperial College London, London, UK

Ganesh Chauhan, Centre for Brain Research, Indian Institute of Science, Bangalore, India

Elisabeth Tournier-Lasserre, UMR-S 740, INSERM, Paris, France

Sara Kaffashian, INSERM U1219 Bordeaux Population Health Research Center, Bordeaux, France

Cecilia Samieri, INSERM U1219 Bordeaux Population Health Research Center, ISPED, University of Bordeaux, Bordeaux, France

Carole Dufouil, INSERM U1219 Bordeaux Population Health Research Center, Department of Public Health, CHU Bordeaux, Bordeaux, France

Stephanie Debette, INSERM U1219 Bordeaux Population Health Research Center, Bordeaux, France, University of Bordeaux, France

Aniket Mishra, INSERM U1219 Bordeaux Population Health Research Center, Bordeaux, France, University of Bordeaux, France

Lawrence Wee, Data Analytics Department, Institute for Infocomm Research (I2R), Singapore, Singapore

Saima Siddiqi, Institute of Biomedical and Genetic Engineering, Islamabad, Pakistan

Jer-Yuarn Wu, Institute of Biomedical Sciences, Academia Sinica, Taipei, Taiwan

Tai-Ming Ko, Institute of Biomedical Sciences, Academia Sinica, Graduate Institute of Integrated Medicine, China Medical University, Taipei, Taiwan

Silvia Bione, Computational Biology Unit, Institute of Molecular Genetics-National Research Council, Pavia, Italy

Katarina Jood, Department of Clinical Neuroscience, Institute of Neuroscience and Physiology, Sahlgrenska Academy at University of Gothenburg, Gothenburg, Sweden

Turgut Tatlisumak, Department of Clinical Neuroscience, Institute of Neuroscience and Physiology, Sahlgrenska Academy at University of Gothenburg, Sahlgrenska University Hospital, Gothenburg, Sweden

Lukas Holmegaard, Department of Clinical Neuroscience, Institute of Neuroscience and Physiology, Sahlgrenska Academy at University of Gothenburg, Gothenburg, Sweden

Antonio Arauz, Stroke Clinic, Instituto Nacional de Neurologia y Neurocirugia, Manuel Velasco Suarez, Mexico City, Mexico

Michal Korostynski, Department of Molecular Neuropharmacology, Polish Academy of Sciences, Warsaw, Poland

Lenore Launer, Laboratory of Epidemiology and Population Science, Intramural Research Program, National Institutes of Health, National Institute on Aging, Bethesda, USA

Suo Yue, Ion Torrent by Life Technologies (company), Carnegie Mellon University, San Francisco, USA

Anna Bersano, Cerebrovascular Unit, IRCCS Foundation C. Besta Neurological Institute, Milan, Italy

Tomasz Dzedzic, Department of Neurology, Jagiellonian University, Krakow, Poland

Karol Józef Juchniewicz, Jagiellonian University, Krakow, Poland

Adamski Mateusz, Jagiellonian Centre for Experimental Therapeutics, Jagiellonian University, Krakow, Poland

Joanna Pera, Department of Neurology, Jagiellonian University Medical College, Krakow, Poland

Agnieszka Slowik, Department of Neurology, Jagiellonian University Medical College, Krakow, Poland

Andrzej Urbanik, Department of Radiology, Jagiellonian University Medical College, Krakow, Poland

Jerzy Gasowski, Department of Internal Medicine and Gerontology, Jagiellonian University Medical College, Krakow, Poland

Rafa Olszanecki, Faculty of Medicine, Jagiellonian University Medical College, Krakow, Poland

Marcin Wnuk, Jagiellonian University Medical College, Poland

Christopher Levi, John Hunter Hospital, Hunter Medical Research Institute and University of Newcastle, Newcastle, Australia

Aaron Gusdon, Department of Neurology, Johns Hopkins Medicine, University of Pittsburgh School of Medicine, Baltimore, USA

Konstantinos Kostulas, Department of Clinical Neuroscience, Karolinska Institute, Stockholm, Sweden

Milita Crisby, Division of Clinical Geriatrics, Neurobiology Care Sciences and Society, Karolinska Institute, Huddinge, Sweden

Lina Keller, Karolinska Institutet, Stockholm, Sweden

Kristina Schlicht, Institut für Medizinische Informatik und Statistik, Kiel University, Kiel, Germany

Jessye Maxwell, Social genetic and Developmental Psychiatry, King's College London, London, UK

Christof Haffner, Institute for Stroke and Dementia Research, Klinikum der Universität München, Munich, Germany

Marco Duering, Institute for Stroke and Dementia Research, Klinikum der Universität München, Ludwig-Maximilians-University LMU, Munich, Germany

Jeremiasz Jagiella, Krakow University Hospital, Krakow, Poland

Robin Lemmens, Department of Neurosciences, Experimental Neurology, KU Leuven – University of Leuven, Department of Neurology, University Hospitals Leuven, VIB Center for Brain & Disease Research, Leuven, Belgium

Jun Hata, Department of Epidemiology and Public Health, Kyushu University, Graduate School of Medical Sciences, Fukuoka, Japan

Toshiharu Ninomiya, Department of Epidemiology and Public Health, Kyushu University, Graduate School of Medical Sciences, Fukuoka, Japan

Vinh Nguyen, School of Psychological Science, La Trobe University, Melbourne, Australia

Bjorn Logi Thorarinnsson, Department of Neurology, Landspítali Háskólasjúkrahús, Reykjavík, Iceland

Saskia Lesnik Oberstein, Department of Clinical Genetics, Leiden University Medical Center, Leiden, Netherlands

Tsong-Hai Lee, Neurology department and Stroke center, Linkou Chang Gung Memorial Hospital, Taipei, Taiwan

Alexandr Rakitko, Lomonosov Moscow State University, Moscow, Russia

Rainer Malik, Institute for Stroke and Dementia Research, Ludwig-Maximilians-University, Klinikum der Universität München, Munich, Germany

Martin Dichgans, Institute for Stroke and Dementia Research, Ludwig-Maximilians-University, Klinikum der Universität München, Munich Cluster for Systems Neurology (SyNergy), Munich, Germany

Arne Lindgren, Department of Clinical Sciences Lund, Neurology, Lund University, Department of Neurology and Rehabilitation Medicine, Skåne University Hospital, Lund, Sweden

Johan Wasselius, Department of Clinical Sciences Malmö, Lund University, Vascular Center, Skåne University Hospital, Malmö, Sweden

Mattias Drake, Diagnostic Radiology, Lund University, Lund, Sweden

Olle Melander, Department of Clinical Sciences, Lund University, Lund, Sweden

Martin Stenman, Geriatric Medicine, Lund University, Lund, Sweden

Andreea Ilinca, Neurology, Lund University, Lund, Sweden

Julie Staals, Department of Neurology, Maastricht University Medical Center (MUMC+), Cardiovascular Research Institute Maastricht (CARIM), Maastricht, Netherlands

Ariane Sadr-Nabavi, Medical Genetics Research Center (MGRC), Mashhad University of Medical Sciences (MUMS), School of Medicine, Department of Medical Genetics, Mashhad University of Medical Sciences (MUMS), Faculty of Medicine, Mashhad, Iran

Katherine Crawford, Center for Genomic Medicine, Massachusetts General Hospital, Boston, MA, USA

Jose Florez, Center for Human Genetic Research, MGH, Massachusetts General Hospital, Harvard Medical School, Boston, MA, USA

Umme Lena, Massachusetts General Hospital, South Hadley, MA, USA

Farrah Mateen, Department of Neurology, Massachusetts General Hospital, Boston, MA, USA

Hakan Ay, Department of Neurology, Massachusetts General Hospital, Boston, MA, USA

Ona Wu, Department of Neurology, JPK Stroke Research Center, Massachusetts General Hospital and Harvard Medical School, Department of Radiology, Athinoula A. Martinos Center for Biomedical Imaging, MGH, Boston, MA, USA

Markus Schirmer, Department of Neurology, J. Philip Kistler Stroke Research Centre, Massachusetts General Hospital and Harvard Medical School, Boston, USA

Javier Romero, Division of Neurocritical Care and Emergency Neurology, Department of Neurology, Massachusetts General Hospital, Harvard Medical School, J. P. Kistler Stroke Research Center, Massachusetts General Hospital, Harvard Medical School, Boston, MA, USA

Steve Cramer, Neurology, Anatomy & Neurobiology, and Physical Medicine & Rehabilitation, University of California Irvine, Irvine, USA

Polina Golland, The Computer Science and Artificial Intelligence Laboratory, Massachusetts Institute of Technology, Cambridge, USA

Bertram Mueller-Myhsok, Max-Planck-Institute of Psychiatry, Munich, Germany

Robert Brown, Department of Neurology, Mayo Clinic, Rochester, MN, USA

James Meschia, Department of Neurology, Mayo Clinic, Jacksonville, USA

Owen A. Ross, Department of Medical Genetics and Neuroscience, Mayo Clinic, Jacksonville, USA

Thomas Brott, Neurology, Mayo Clinic, Department of Surgery, University of Medicine and Dentistry of New Jersey, Jacksonville, FL, USA

Guillaume Pare, Population Health Research Institute, McMaster University, Hamilton, Canada

Mike Chong, Population Health Research Institute, McMaster University, Hamilton, Canada

Ossama Yassin Mansour, Department of Neurology, Medical school of Alexandria, Alexandria Governorate, Egypt

Bartosz Karaszewski, Department of Adult Neurology, Medical University of Gdansk & University Clinical Centre in Gdansk, Gdansk, Poland

Christian Enzinger, Department of Neurology, Medical University of Graz, Graz, Austria

Helena Schmidt, Institute of Molecular Biology and Biochemistry, Medical University of Graz, Graz, Austria

Reinhold Schmidt, Department of Neurology, Medical University of Graz, Graz, Austria

Stephan Seiler, Department of Neurology, Medical University of Graz, Graz, Austria  
Alexander Pichler, Department of Neurology, Medical University of Graz, Graz, Germany  
Bruce Ovbiagele, Department of Neurology, Medical University of South Carolina, Charleston, USA  
Yoshiji Yamada, Department of Human Genomics, Mie University, Life Science Research Center, Mie, Japan  
Tatjana Rundek, Department of Neurology, Miller School of Medicine, University of Miami, Miami, FL, USA  
Susan Blanton, John P. Hussman Institute for Human Genomics, Miller School of Medicine, University of Miami, Miami, FL, USA  
Joseph Chern, Department of Neurology, College of Medicine, National Cheng Kung University, Tainan, Taiwan  
Chris O'Donnell, Cardiovascular Epidemiology and Human Genomics Branch, National Heart, Lung and Blood Institute, Intramural Research, Veterans Administration Healthcare, Center for Population Genomics, Boston, MA, USA  
Roderick Corriveau, National Institute of Neurological Disorders and Stroke, National Institute of Health, University of California, Bethesda, MD, USA  
Pallab Bhattacharya, National Institute of Pharmaceutical Education and Research, Ahmedabad, India  
Andrew Singleton, Laboratory of Neurogenetics, National Institute on Aging, Intramural Research Program, Bethesda, MD, USA  
Katrina Gwinn, National Institute of Neurological Disorders and Stroke, National Institutes of Health, Bethesda, MD, USA  
Bharatendu Chandra, General neurology and Stroke, National University Hospital, Singapore, Singapore  
Christopher Chen, Department of Pharmacology, National University of Singapore, Singapore, Singapore  
Raj Kalaria, Institute of Neuroscience, Newcastle University, Newcastle, UK  
Jim Koenig, Division of Neuroscience, Stroke Program in the Neural Environment, NINDS, Bethesda, MA, USA  
Om Prakash Singh, Department of Environmental Studies, North Eastern Hill University (NEHU), Shillong, India  
Akintomi Olugbodi, Obafemi Awolowo University, Ile-Ife, Nigeria  
Bishwa Sapkota, Harold Hamm Diabetes Center, Oklahoma University, Oklahoma City, USA  
Rebecca Jackson, Center for women's health, Ohio State University Wexner Medical Center, Columbus, USA  
Eva Giralt, Parc de Salut Mar, Barcelona, Spain  
Danish Saleheen, Department of Genetics, Perelman School of Medicine, University of Pennsylvania, Pennsylvania, PA, USA  
Frank-Erik de Leeuw, Department of Neurology, Radboud University Medical Center, Nijmegen, Netherlands  
Karin Klijn, Department of Neurology, Radboud University Medical Centre, Donders Institute for Brain, Cognition and Behaviour, Department of Neurology and Neurosurgery,

University Medical Center, Brain Center Rudolf Magnus, Nijmegen, Netherlands  
Jes Olesen, Department of Clinical Medicine, Rigshospitalet - Neurocentret, Glostrup, Denmark  
Yoichiro Kamatani, Laboratory for Statistical Analysis, RIKEN Center for Integrative Medical Sciences, Center for Genomic Medicine, Kyoto University Graduate School of Medicine, Yokohama, Japan  
Michiaki Kubo, RIKEN Center for Integrative Medical Sciences, Yokohama, Japan  
Yukinori Okada, Laboratory for Statistical Analysis, RIKEN Center for Integrative Medical Sciences, Department of Statistical Genetics, Osaka University Graduate School of Medicine, Yokohama, Japan  
David Spence, Stroke Prevention & Atherosclerosis Research Centre, Robarts Research, London (ON), Canada  
Annie Pedersen, Västra Vötalandsregionen, Sahlgrenska Academy at University of Gothenburg, Gothenburg, Sweden  
Maja Olsson, Department of Medical and Clinical Genetics, Institute of Biomedicine, Sahlgrenska Academy at University of Gothenburg, Gothenburg, Sweden  
Turgut Tatlisumak, Department of Clinical Neurosciences/Neurology, Sahlgrenska Academy at University of Gothenburg, Institute of Neuroscience and Physiology, Sahlgrenska University Hospital, Gothenburg, Sweden  
Giacomo Giacalone, Neurology Department, San Raffaele Scientific Institute, University Vita- Salute San Raffaele, Milan, Italy  
Juan José Martín, Department of Neurology, Sanatorio Allende, Cordoba, Argentina  
Rodrigo Bazan, Department of Neurology, São Paulo State University (Unesp) Botucatu Medical School, Botucatu, Brazil  
Gabriel Braga, Hospital das Clínicas, São Paulo State University (Unesp) Botucatu Medical School, Botucatu, Brazil  
Steve Bevan, School of Life Science, University of Lincoln, Lincoln, UK  
Huichun Xu, Medicine department, School of Medicine, University of Maryland, Baltimore, USA  
Tim Assimes, Cardiovascular Medicine, School of Medicine, University of Stanford, Stanford, USA  
Jamie Wright, Anderson Cancer Center, MD Anderson Clinical Cancer Genetics, School of Medicine, University of Texas, Houston, USA  
Anton Raskurazhev, Scientific Center of Neurology, Moscow, Russia  
Wei Ling Lee, National Neuroscience Institute, Singapore General Hospital, Department of Pediatrics, National University of Singapore, Yong Loo Lin School of Medicine, Singapore, Singapore  
Eng King Tan, Department of Neurology, Singapore General Hospital, National Neuroscience Institute, Neuroscience and Behavioral Disorders Program, Duke-National University of Singapore Graduate Medical School, Singapore, Singapore  
Philippe Burri, Department of Cardiology, Skane University Hospital, Malmö, Sweden  
Petrea Frid, Critical Care Neurology, Skåne University Hospital, Lund university, Malmö, Sweden  
Christian Opherk, Department of Neurology, SLK-Kliniken Heilbronn GmbH, Heilbronn, Germany  
Chaeyoung Lee, Department of Bioinformatics and Life Science, Soongsil

University, Seoul, Korea

David Tregouet, Team Genomics and Pathophysiology of Cardiovascular Diseases, Sorbonne Universités, UPMC Univ. Paris 06, INSERM, UMR\_S 1166, ICAN Institute for Cardiometabolism and Nutrition, Paris, France

Zhen Deng, Department of Neurology, Southern Medical University, FIMMU, Guangzhou, China  
Hung Yi Chiou, School of Public Health, College of Public Health and Nutrition, Taipei Medical University, Taipei, Taiwan

Mahdi Habibi-Koolaei, Department of Health Information Management, Tehran University of Medical Sciences (TUMS), Tehran, Iran

Murali Vijayan, Garrison Institute on Aging, Texas Tech University Health Sciences Center, Lubbock, USA

Thomas Leung, Division of Neurology, Department of Medicine and Therapeutics, The Chinese University of Hong Kong, Hong-Kong, Hong-Kong

Lawrence Wong, Division of Neurology, Department of Medicine and Therapeutics, The Chinese University of Hong Kong, Hong-Kong, Hong-Kong

Vincent Mok, Department of Medicine and Therapeutics, The Chinese University of Hong Kong, Hong-Kong, Hong-Kong

Richard Choy, Department of Obstetrics and Gynecology, The Chinese University of Hong Kong, Hong-Kong, Hong-Kong

Christina Jern, Department of Pathology and Genetics, The Sahlgrenska Academy at University of Gothenburg, Institute of Biomedicine, Gothenburg, Sweden

Elena Lebedeva, Department of Neurology and Neurosurgery, The Urals State Medical University, International Headache Center 'Europe-Asia', Yekaterinburg, Russia

Martin Farrall, Department of Cardiovascular Medicine, The Wellcome Trust Centre for Human Genetics, Oxford, UK

Xu Jiayuan, Department of Radiology, Tianjin Medical University (TIJMU), Tianjin, China

Keat Wei Loo, Tunku Abdul Rahman University, UTAR, Kampar Perak, Malaysia

Isabel Hostettler, Stroke Research Center, UCL Institute of Neurology, London, UK

Gabriel J.E Rinkel, Department of Neurology and Neurosurgery, UMC Utrecht, Brain Center Rudolf Magnus, Utrecht, Netherlands

Anderson Goncalves, Universidade da Região de Joinville, Joinville, Brazil

Paulo Franca, Department of Medicine, Universidade da Região de Joinville – Univille, Joinville, Brazil

Norberto Cabral, Department of Medicine, Universidade da Região de Joinville (Univille), Joinville, Brazil

Ischia Cendes, Molecular Genetics Laboratory, Universidade Estadual de Campinas, Faculdade de Ciências Médicas, Campinas, Brazil

Caty Carrera, Neurovascular Research Laboratory, Vall d'Hebron Institut of Research, Neurology and Medicine Departments, Universitat Autònoma de Barcelona, Vall d'Hebrón Hospital, Stroke Pharmacogenomics and Genetics, Fundacio Docència i Recerca Mutua Terrassa, Spain

Israel Fernandez-Cadenas, Neurovascular Research Laboratory, Vall d'Hebron Institut of Research, Neurology and Medicine Departments, Universitat Autònoma de Barcelona, Vall d'Hebrón Hospital, Stroke Pharmacogenomics and Genetics, Fundacio Docència i Recerca

Mutua Terrassa, Barcelona, Spain

Joan Montaner, Neurovascular Research Laboratory, Universitat Autònoma de Barcelona, Vall d'Hebron Institute of Research, Neurology Department, Hospital Vall d'Hebron, Barcelona, Spain

Helen Kim, Department of Anesthesia and Perioperative Care, Center for Cerebrovascular Research, and Department of Epidemiology and Biostatistics, Institute for Human Genetics, University of California, San Francisco, USA

Arndt Rolfs, Albrecht Kossel Institute, University Clinic of Rostock, Rostock, Germany

Mayowa Owolabi, Department of Neurology, University College Hospital, Ibadan, Nigeria

Reecha Sofat, Metabolism & Experimental Therapeutics, Division of Medicine, Faculty of Medical Sciences, University College London, London, UK

Mark Bakker, University Medical Center Utrecht, Utrecht, Netherlands

Femke van't Hof, University Medical Center Utrecht, Utrecht, Netherlands

Dominique PV de Kleijn, Laboratory of Experimental Cardiology, University Medical Center Utrecht, ICIN-Netherlands Heart Institute, Utrecht, Netherlands

Ynte Ruigrok, Department of Neurology and Neurosurgery, University Medical Center Utrecht, Brain Center Rudolf Magnus, The Dutch Parelsnoer Institute-Cerebrovascular accident (CVA) Study Group, Utrecht, Netherlands

Allard Hauer, Department of Neurology and Neurosurgery, University Medical Center Utrecht, Brain Center Rudolf Magnus, Utrecht, Netherlands

Sara L. Pulit, Department of Neurology, University Medical Center Utrecht, Brain Center Rudolf Magnus, Utrecht, Netherlands

Ale Algra, Department of Neurology and Neurosurgery, University Medical Center Utrecht, Brain Center Rudolf Magnus, Julius Center for Health Sciences and Primary Care, University Medical Center Utrecht, Utrecht, Netherlands

Sander W. van der Laan, Laboratory of Experimental Cardiology, University Medical Center Utrecht, Division of Heart and Lungs, Utrecht, Netherlands

Mary Macleod, Department of Medicine & Therapeutics, University of Aberdeen, King's College, Aberdeen, UK

George Howard, School of Public Health, University of Alabama, Birmingham, AL, USA

Hemant Tiwari, Department of Biostatistics, University of Alabama, Birmingham, AL, USA

Ryan Irvin, Department of Epidemiology, University of Alabama at Birmingham, Birmingham, AL, USA

Karen C. Albright, Neurology, University of Alabama Hospital, Spectrum Health - Butterworth Campus, Birmingham, AL, USA

Rodney Perry, Department of Epidemiology, University of Alabama School of Medicine, Birmingham, AL, USA

Chelsea Kidwell, Department of Neurology, University of Arizona, Stroke Center at Georgetown, University of Georgetown, Tucson, AZ, USA

Aleksandra Pavlovic, Neurology Clinic, Clinical Center of Serbia, University of Belgrade, Faculty of Medicine, Belgrade, Serbia

Christophe Tzourio, University of Bordeaux, INSERM U1219, Bordeaux, France

Murali Sargurupremraj, INSERM U1219 Bordeaux Population Health Research Center,



University of Bordeaux, Bordeaux, France

Sabrina Schilling, University of Bordeaux, Bordeaux, France

Alessandro Padovani, Department of Clinical and Experimental Sciences, University of Brescia, Brescia, Italy

Alessandro Pezzini, Department of Clinical and Experimental Sciences, University of Brescia, Neurology Clinic, Brescia, Italy

Foad Abd-Allah, Department of Neurology, University of Cairo, Cairo, Egypt

Charles DeCarli, Alzheimer's Disease Center, University of California Davis, Sacramento, CA, USA

Yuqi Zhao, Department of Integrative Biology and Physiology, University of California, Los Angeles, CA, USA

David Liebeskind, Department of Neurology, University of California, Los Angeles, CA, USA Matthew Traylor, Stroke Research Group, Division of Clinical Neurosciences, University of Cambridge, Cambridge, UK

Rhea Tan, Department of Clinical Neurosciences, University of Cambridge, Cambridge, UK

John Danesh, MRC/BHF Cardiovascular Epidemiology Unit, Department of Public Health and Primary Care, University of Cambridge, The National Institute for Health Research Blood and Transplant Research Unit in Donor Health and Genomics, Wellcome Trust Sanger Institute, Cambridge, UK

Susanna C. Larsson, Department of Clinical Neurosciences, Neurology Unit, University of Cambridge, Cambridge, UK

Loes Rutten-Jacobs, Stroke Research Group, University of Cambridge, Division of Clinical Neurosciences, DZNE, Cambridge, UK

Amanda Donatti, School of Medical Sciences, FCM, University of Campinas, UNICAMP, São Paulo, Brazil

Wagner Avelar, Department of Neurology, University of Campinas, UNICAMP, São Paulo, Brazil

Joseph Broderick, Gardner Neuroscience Institute, Comprehensive Stroke Center, University of Cincinnati, Cincinnati, OH, USA

Daniel Woo, University of Cincinnati College of Medicine, Cincinnati, OH, USA

Charles J Moomaw, University of Cincinnati College of Medicine, Cincinnati, OH, USA

Brett Kissela, Department of Neurology and Rehabilitation Medicine, University of Cincinnati Gardner Neuroscience Institute, Comprehensive Stroke Center, Cincinnati, OH, USA

Laura Garcia Ibenez, Institute for Cancer Genetics, University of Columbia, New York, USA

Rustam Salman, Centre for Clinical Brain Sciences, University of Edinburgh, Edinburgh, UK

Cathie Sudlow, Centre for Medical Informatics, Usher Institute, University of Edinburgh, Edinburgh, UK

Kristiina Rannikmäe, Centre for Medical Informatics, Usher Institute, University of Edinburgh, Edinburgh, UK

Caitrin Wheeler McDonough, College of Pharmacy, University of Florida, Gainesville, FL,

USA

Scott Silliman, Department of Neurology, University of Florida College of Medicine, Jacksonville, FL, USA

Oyunbileg Magvanjav, Department of Pharmacotherapy and Translational Research and Center for Pharmacogenomics, University of Florida, College of Pharmacy, Gainesville, FL, USA

Tom van Agtmael, Institute of Cardiovascular and Medical Sciences, University of Glasgow, Glasgow, UK

Matthew Walters, School of Medicine, Dentistry and Nursing, University of Glasgow, Glasgow, UK

Martin Söderholm, Bioinformatics Core Facility, University of Gothenburg, Gothenburg, Sweden

Erik Lorentzen, Bioinformatics Core Facility, University of Gothenburg, Gothenburg, Sweden

Sandra Olsson, University of Gothenburg, Gothenburg, Sweden

Tara Stanne, University of Gothenburg, Gothenburg, Sweden

Martina Olsson, University of Gothenburg, Gothenburg, Sweden

Kazuma Nakagawa, University of Hawaii, John A. Burns School of Medicine, Department of Neurology, The Queen's Medical Center, Honolulu, USA

Rufus Akinyemi, Institute for Advanced Medical Research and Training, University of Ibadan, College of Medicine, Ibadan, Nigeria

Ioana Cotlatciuc, Institute of Cardiovascular Research Royal Holloway, University of London, London, UK

Jeff O'Connell, Medicine department, University of Maryland, Animal Genetics Improvement Laboratory, United States Department of Agriculture, Baltimore, MD, USA

Mary Sparks, Department of Neurology, University of Maryland, Baltimore, MD, USA

John Sorkin, Department of Neural and Pain Sciences, University of Maryland, Baltimore, MD, USA

Patrick McArdle, Division of Endocrinology, Diabetes and Nutrition, University of Maryland School of Medicine, Baltimore, MD, USA

Tushar Dave, Bioinformatics, University of Maryland School of Medicine, Baltimore, MD, USA

Colin Stine, Epidemiology & Public Health, University of Maryland School of Medicine, Baltimore, MD, USA

Steven Kittner, Department of Neurology, University of Maryland School of Medicine and Baltimore VAMC, Baltimore, MD, USA

Jill Naylor, University of Melbourne, Melbourne, Australia

Devin Brown, Department of Neurovascular, University of Michigan Medical School, Ann Arbor, USA

Mario Di Napoli, Department of Neurology, University of Naples, Naples, Italy

Rose Du, Comprehensive Cancer Center, University of New Mexico, Albuquerque, NM, USA

Tobias B. Kulik, Neurology, University of New Mexico, Albuquerque, NM, USA

John Attia, School of Medicine and Public Health, University of Newcastle, New Lambton, Australia

Shahbaz Zamani, University of Newcastle, Newcastle, Australia

James E Faber, Cell Biology and Physiology, University of North Carolina, Chapel Hill, USA

Peter Rothwell, Nuffield Department of Clinical Neurosciences, University of Oxford, Oxford, UK

Iona Y Millwood, Clinical Trial Service Unit and Epidemiological Studies Unit, Nuffield Department of Population Health, and MRC Population Health Research Unit, University of Oxford, Oxford, UK

Elsa Valdés Márquez, CTSU-Clinical Trial Service Unit and Epidemiological Studies Unit, University of Oxford, Oxford, UK

Michelangelo Mancuso, Department of Neurology, University of Pisa, Pisa, Italy

Doralina Brum Souza, Department of Neurology, University of Sao Paulo, Ribeirao Preto, Brazil

Ranil de Silva, Genetic, Diagnostic and Research Laboratory, Department of Anatomy, University of Sri Jayewardenepura, Faculty of Medical Sciences, Nugegoda, Sri Lanka

Riina Vibo, Department of Neurology and Neurosurgery, University of Tartu, Tartu, Estonia

Janika Korv, Department of Neurology and Neurosurgery, University of Tartu, Tartu, Estonia

Jane Maguire, Faculty of Health, University of Technology Sydney, Ultimo, Australia

Myriam Fornage, Brown Foundation Institute of Molecular Medicine // Human Genetics Center, University of Texas Health Science Center at Houston, Houston, TX, USA

Kachikwu Illoh, University of Texas Medical School, Houston, TX, USA

Dianna Milewicz, Division of Medical Genetics, University of Texas Health Science Center, McGovern Medical School, Department of Internal Medicine, University of Texas Health Science Center, McGovern Medical School, Houston, TX, USA

Jennifer Majersik, Neurology, University of Utah, Salt Lake City, UT, USA

Adam DeHavenon, Department of Neurology, University of Utah, Salt Lake City, UT, USA

Yashar Kalani, Neurobiology and Anatomy, University of Utah School of Medicine, Salt Lake City, UT, USA

Matthew Alexander, Radiology and Imaging Sciences, University of Utah School of Medicine, Neurosurgery, University of Utah School of Medicine, Salt Lake City, UT, USA

Mary Cushman, Department of Hematology and oncology, University of Vermont, Medical Center, Colchester, USA

Michele Sale, Center for Public Health Genomics, University of Virginia, Charlottesville, VA, USA

Andrew Southerland, Departments of Neurology and Public Health Sciences, University of Virginia, Charlottesville, VA, USA

Debra Owens, Newborn Intensive Care Units, University of Virginia Children's Hospital, Charlottesville, VA, USA

Keith Keene, Center for Public Health Genomics, University of Virginia School of Medicine, Charlottesville, VA, USA

Stephen Rich, Center for Public Health Genomics, University of Virginia School of

Medicine, Charlottesville, VA, USA

Bruce Psaty, Cardiovascular Health Research Unit, Department of Medicine, University of Washington, Department of Epidemiology, University of Washington, Seattle, WA, USA

Will Longstreth, Department of Epidemiology, University of Washington, Department of Neurology, University of Washington, Seattle, USA

Masharip Atadzhanov, Department of Neurology, University Teaching Hospital, Lusaka, Zambia

Stacey Quintero Wolfe, Wake Forest Baptist Health, Winston-Salem, NC, USA

Carl Langefeld, Center for Public Health Genomics and Department of Biostatistical Sciences, Wake Forest School of Medicine, Winston-Salem, NC, USA

Cheryl Bushnell, Department of Neurology, Wake Forest University Medical Center, Winston-Salem, NC, USA

Carlos Cruchaga, Department of Psychiatry, The Hope Center Program on Protein Aggregation and Neurodegeneration (HPAN), Washington University School of Medicine, Department of Developmental Biology, Washington University School of Medicine, St. Louis, MO, USA

Jan Konrad, Department of Psychiatry, The Hope Center Program on Protein Aggregation and Neurodegeneration (HPAN), Washington University, School of Medicine, St. Louis, MO, USA

Junfeng Liu, West China Medical School, Sichuan University, Sichuan, China

Kevin Sheth, Department of Neurology, Neuro Intensive Care & Neurological Emergencies, Yale School of Medicine, New Haven, CT, USA

Guido Falcone, Department of Neurology, Yale University School of Medicine, Program in Medical and Population Genetics, The Broad Institute of Harvard and MIT, New Haven, CT, USA

Kathleen Donahue, J. Philip Kistler Stroke Research Center, Massachusetts General Hospital, USA

Varinder S Alg, Stroke Research Centre, Institute of Neurology, University College London, London, United Kingdom

Henry Houlden, Neurogenetics Laboratory, The National Hospital of Neurology and Neurosurgery, London, United Kingdom

Tatiana Foroud, Department of Medical and Molecular Genetics, Indiana University School of Medicine, Indianapolis, USA

Dongbing Dai, Department of Medical and Molecular Genetics, Indiana University School of Medicine, Indianapolis, USA

Emilia I Gaal-Paavola, Department of Neurosurgery, Helsinki University Hospital, University of Helsinki, Helsinki, Finland

Hanna Kaukovalta, Department of Neurosurgery, Helsinki University Hospital, University of Helsinki, Helsinki, Finland

Riku Kivisaari, Department of Neurosurgery, Helsinki University Hospital, University of Helsinki, Helsinki, Finland

Aki Laakso, Department of Neurosurgery, Helsinki University Hospital, University of Helsinki, Helsinki, Finland

Behnam Rezai Jahromi, Department of Neurosurgery, Helsinki University Hospital, University of Helsinki, and Neurosurgery Research Group, Biomedicum, Helsinki, Finland

Riikka Tulamo, Neurosurgery Research Group, Biomedicum, and Department of Vascular Surgery, Helsinki University Hospital, University of Helsinki, Helsinki, Finland

Mika Niemela, Department of Neurosurgery, Helsinki University Hospital, University of Helsinki, Helsinki, Finland

Juha E Jaaskelainen, Neurosurgery NeuroCenter Kuopio, University Hospital Kuopio, and Institute of Clinical Medicine, Faculty of Health Sciences, University of Eastern Finland Kuopio, Finland

Mikael von und zu Fraunberg, Neurosurgery NeuroCenter Kuopio, University Hospital Kuopio, and Institute of Clinical Medicine, Faculty of Health Sciences, University of Eastern Finland Kuopio, Finland

Antti Lindgren, Neurosurgery NeuroCenter Kuopio and Department of Clinical Radiology, University Hospital Kuopio, and Institute of Clinical Medicine, Faculty of Health Sciences, University of Eastern Finland Kuopio, Finland

Nerissa U Ko, Department of Neurology, University of California, San Francisco, USA

Guy A Rouleau, Montreal Neurological Institute and Hospital, McGill University, Montréal, , Canada
